# Supplementary material for: Reusable and pH-Stable Luminescent Sensors for Highly Selective Detection of Phosphate
Source: MDPI journal article supplement (doi:10.3390/polym14010190), 2022-01-04
Supplement: s1 [file s1]

## Supporting Information

# Reusable and pH-Stable Luminescent Sensors for Highly Selective Detection of Phosphate

Do Yeob Kim <sup>1,†</sup>, Dong Gyu Kim <sup>2,†</sup>, Bongjin Jeong <sup>1</sup>, Young Il Kim <sup>2</sup>, Jungseok Heo <sup>2,\*</sup> and Hyung-Kun Lee <sup>1,\*</sup>

<sup>1</sup> ICT Creative Research Laboratory, Electronics & Telecommunications Research Institute, Daejeon 34129, Korea; nanodykim@etri.re.kr (D.Y.K.); jbj0919@etri.re.kr (B.J.)

<sup>2</sup> Department of Chemistry, Chungnam National University, Daejeon 34134, Korea; kdg05262@naver.com (D.G.K.); yi4902@naver.com (Y.I.K.)

\* Correspondence: jungseokheo@cnu.ac.kr (J.H.); hkleee@etri.re.kr (H.-K.L.); Tel.: +82-42-860-5857 (H.-K.L.)

† These authors contributed equally to this work.

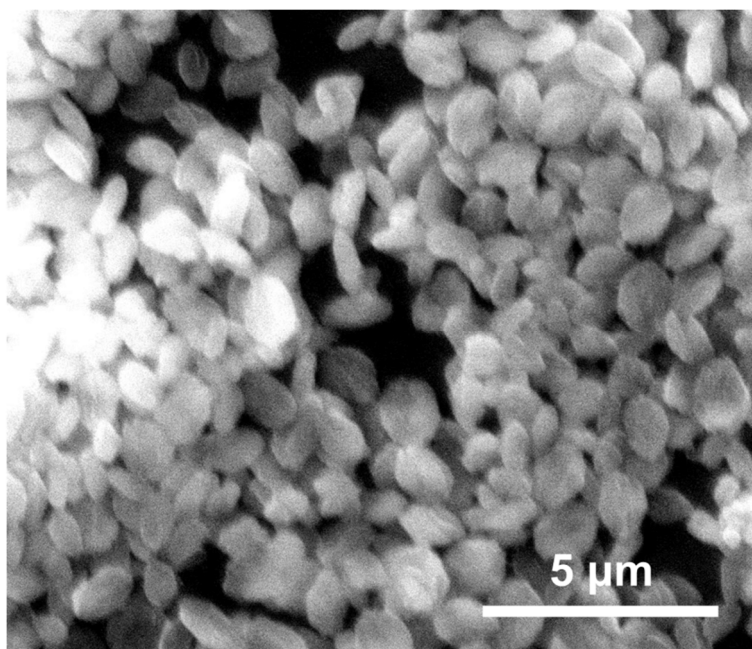

**Figure S1.** SEM image of Eu-TCA microcrystals.

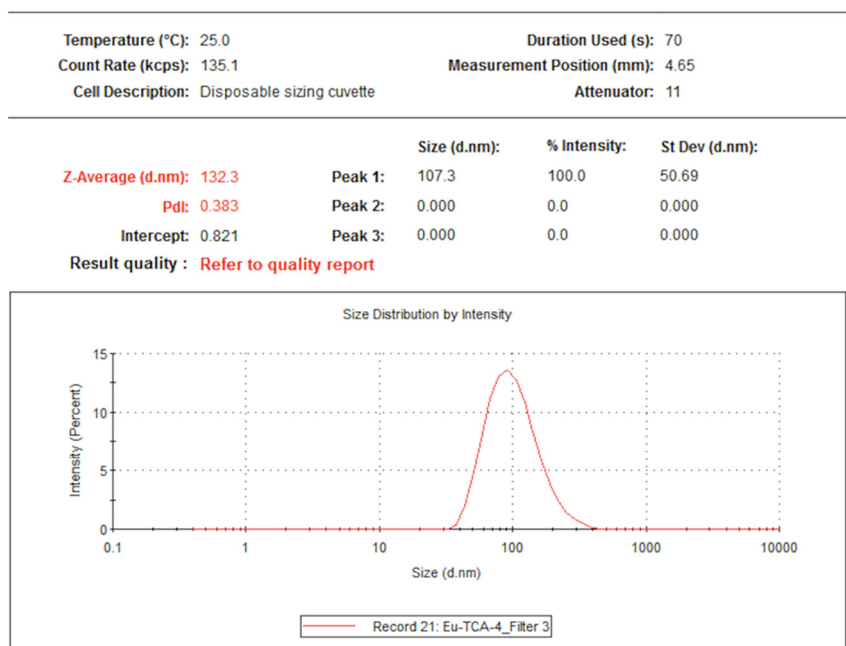

**Figure S2.** Dynamic light scattering analysis of Eu-TCA.

### Synthesis of Eu-TCA microcrystals

EuCl<sub>3</sub> (235 mg, 0.64 mmol, 5.3 eq.), TCA ligand (60 mg, 0.12 mmol, 1 eq.), and polyvinylpyrrolidone (533 mg) were reacted under solvothermal conditions in a mixed solvent of dimethylformamide (32 mL) and ethanol (19 mL). The reaction was conducted at 150°C for 12 h. After the reaction, the reaction mixture was cooled to room temperature over the next 6 h, and colloidal particles were precipitated by centrifugation. Three cycles of washing with dry dimethylformamide and centrifugation were followed by a final wash with ethanol. The sample was dried in an oven at 70°C for 3 h.

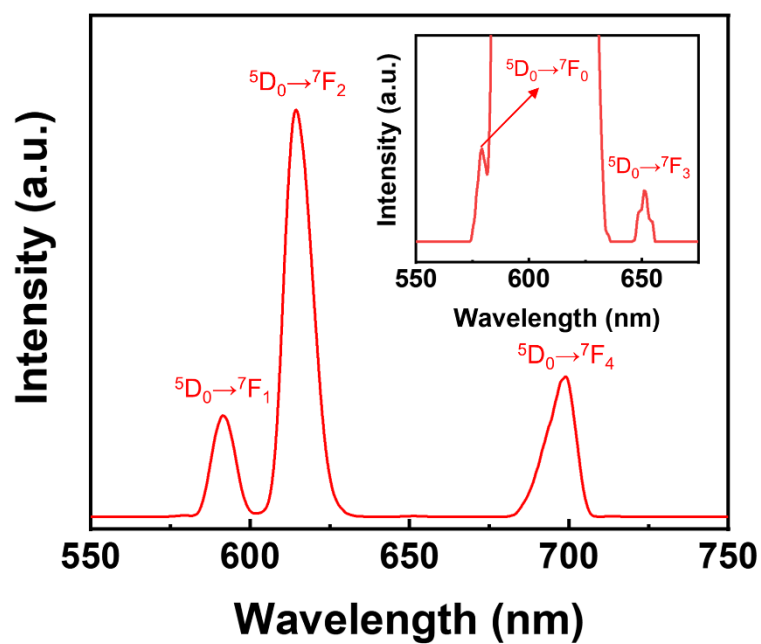

**Figure S3.** Emission spectrum of Eu-TCA dispersion ( $\lambda_{\text{ex}} = 260$  nm). The inset shows enlarged emission spectrum.

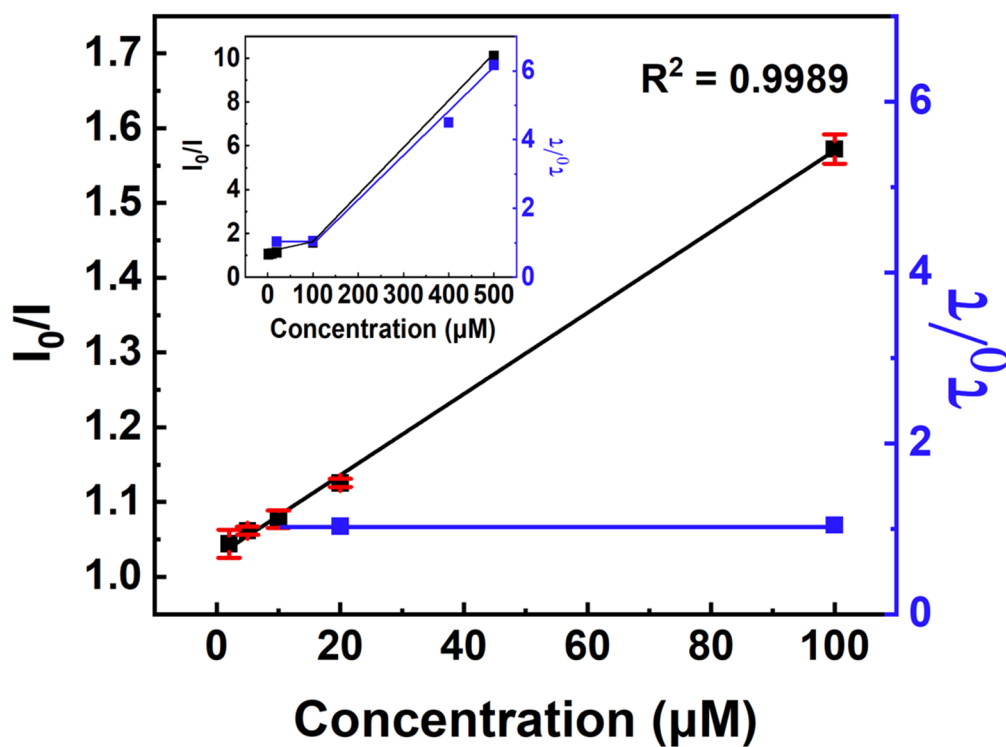

**Figure S4.** *Stern-Volmer* plot for the luminescence quenching of Eu-TCA dispersion upon addition of different concentrations of phosphate. Inset shows the *Stern-Volmer* plot in the concentration range of 2–500  $\mu\text{M}$ .

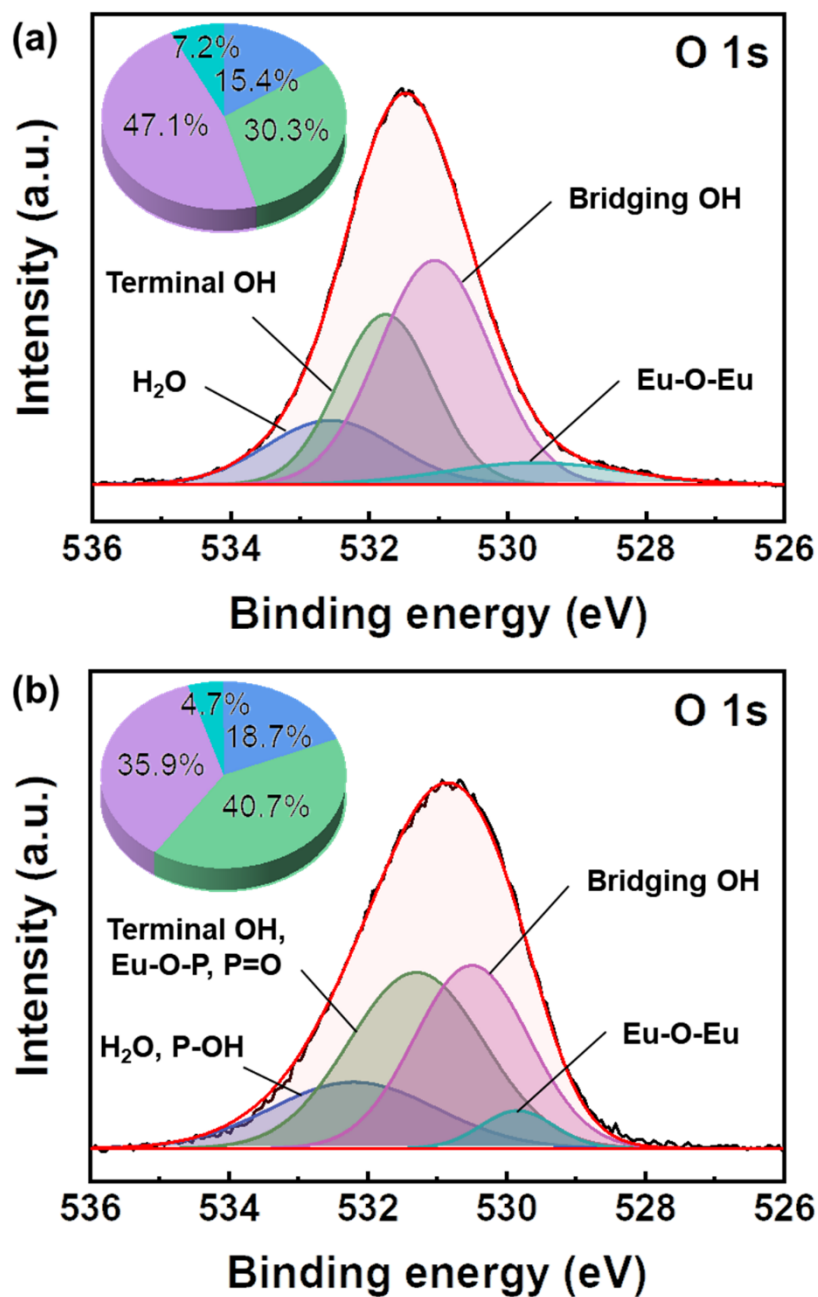

**Figure S5.** Experimental fit performed on O 1s XPS spectra before (a) and after (b) incubation with phosphate.

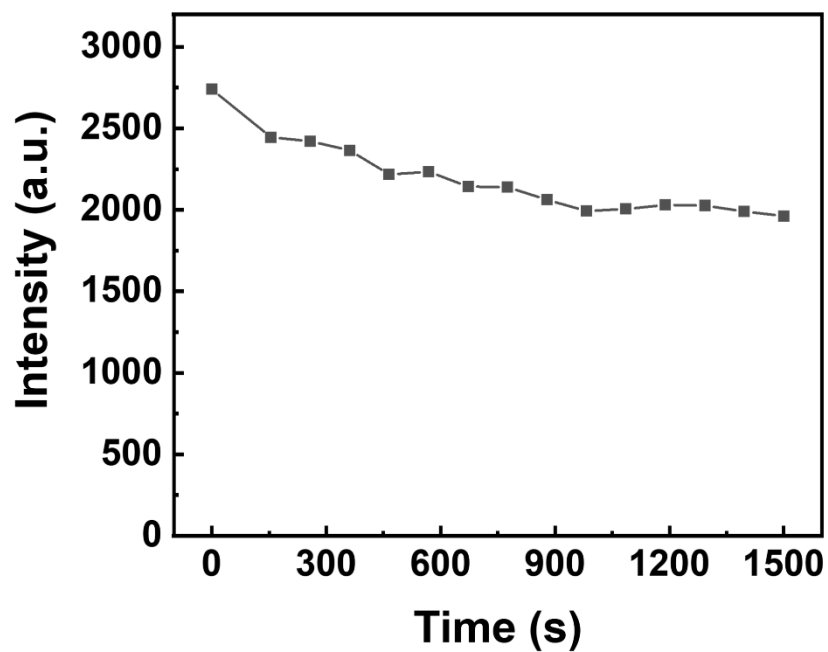

**Figure S6.** Time-dependent luminescence intensity of the Eu-TCA/GMF upon the addition of 100 μM of phosphate.

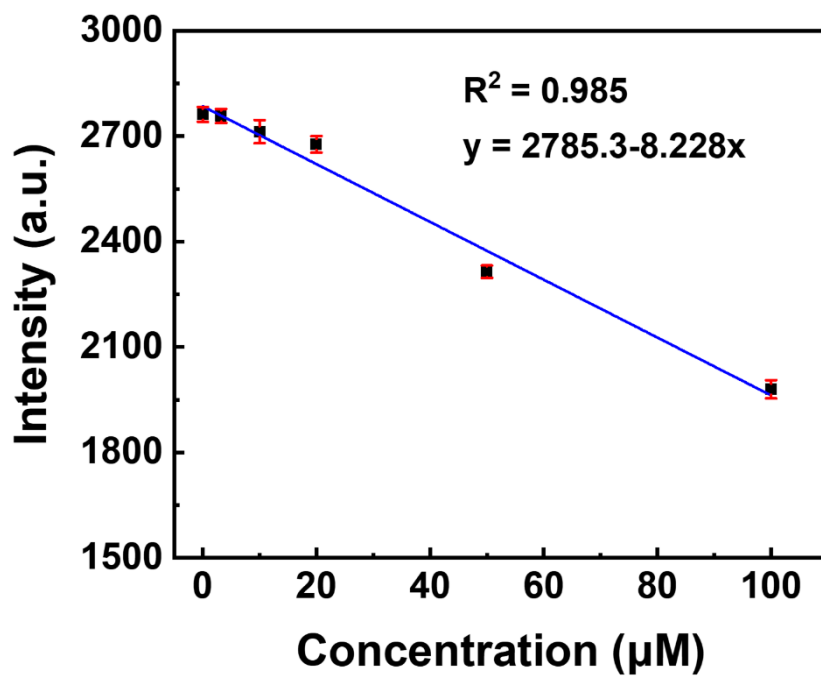

**Figure S7.** The luminescence intensity of Eu-TCA/GMF under various phosphate concentrations and their linear fit curve for the estimation of LOD.

**Table S1.** Comparison of various analytical methods for phosphate detection.

| Analytical methods | Sensing element/structure                                          | Linear range ( $\mu\text{M}$ ) | LOD ( $\mu\text{M}$ ) | Reusable <sup>1</sup> | pH range <sup>2</sup>    | Ref.      |
|--------------------|--------------------------------------------------------------------|--------------------------------|-----------------------|-----------------------|--------------------------|-----------|
| Potentiometry      | Mo-based electrode                                                 | 10–10 <sup>5</sup>             | 1.9                   | O                     | pH-unstable <sup>3</sup> | S1        |
|                    | W-based electrode                                                  | 1–10 <sup>5</sup>              | 0.4                   | O                     | pH-unstable <sup>3</sup> | S2        |
|                    | Polymeric membrane electrode                                       | 32–10 <sup>5</sup>             | 10                    | O                     | pH-unstable <sup>3</sup> | S3        |
| Voltammetry        | Screen-printed electrodes modified with carbon black nanoparticles | 0.5–100                        | 0.1                   | O                     | pH-unstable <sup>3</sup> | S4        |
| I-V measurement    | Ag/graphene composite-based field-effect transistor                | 5–6000                         | 1.2                   | O                     | –                        | S5        |
| Colorimetric probe | Au nanoparticles/Eu <sup>3+</sup>                                  | 0.5–30                         | 0.076                 | X                     | –                        | S6        |
|                    | Functionalized Au nanoparticles                                    | 80–200                         | 120                   | X                     | 7–8                      | S7        |
| Luminescent probe  | Eu@BUC-14                                                          | 5–150                          | 0.88                  | X                     | 4–8                      | S8        |
|                    | UiO-66-NH <sub>2</sub> MOF <sup>4</sup>                            | 5–150                          | 1.25                  | X                     | –                        | S9        |
|                    | Eu-triazole MOF <sup>4</sup>                                       | 3–30                           | 6.62                  | X                     | –                        | S10       |
|                    | Tb-MOF <sup>4</sup>                                                | 40–400                         | 35                    | X                     | –                        | S11       |
|                    | Eu-based nanospheres                                               | 2–100                          | 0.83                  | X                     | 5–9                      | S12       |
|                    | Eu-TCA/GMF                                                         | 3–500                          | 1.52                  | O                     | 3–10                     | This work |

<sup>1</sup> The term “reusable” means the sensing material can be easily reused without complex processes such as centrifugation or drying. <sup>2</sup> pH range that does not affect the sensor performance. <sup>3</sup> Needs pH compensation model. <sup>4</sup> MOF: metal-organic framework.

## References

1. Li, Y.; Jiang, T.; Yu, X.; Yang, H. Phosphate Sensor Using Molybdenum. *J. Electrochem. Soc.* **2016**, *163*, B479–B484.
2. Chen, G.; Xiao, S.; Lorke, A.; Liu, J.; Zhang, P. Assessment of a Solid-State Phosphate Selective Electrode Based on Tungsten. *J. Electrochem. Soc.* **2018**, *165*, B787–B794.
3. Kim, J.; Kang, D. M.; Shin, S. C.; Choi, M. Y.; Kim, J.; Lee, S. S.; Kim, J. S. Functional Polyterthiophene-Appended Uranyl-Salophen Complex: Electropolymerization and Ion-Selective Response for Monohydrogen Phosphate. *Analytica Chimica Acta* **2008**, *614*, 85–92.
4. Talarico, D.; Arduini, F.; Amine, A.; Moscone, D.; Palleschi, G. Screen-Printed Electrode Modified with Carbon Black Nanoparticles for Phosphate Detection by Measuring the Electroactive Phosphomolybdate Complex. *Talanta* **2015**, *141*, 267–272.
5. Bhat, K. S.; Nakate, U. T.; Yoo, J.-Y.; Wang, Y.; Mahmoudi, T.; Hahn, Y.-B. Nozzle-Jet-Printed Silver/Graphene Composite-Based Field-Effect Transistor Sensor for Phosphate Ion Detection. *ACS Omega* **2019**, *4*, 8373–8380.
6. Liu, W.; Du, Z.; Qian, Y.; Li, F. A Specific Colorimetric Probe for Phosphate Detection Based on Anti-Aggregation of Gold Nanoparticles. *Sensors and Actuators B: Chemical* **2013**, *176*, 927–931.
7. He, G.; Zhao, L.; Chen, K.; Liu, Y.; Zhu, H. Highly Selective and Sensitive Gold Nanoparticle-Based Colorimetric Assay for  $\text{PO}_4^{3-}$  in Aqueous Solution. *Talanta* **2013**, *106*, 73–78.
8. Zhang, Y.; Sheng, S.; Mao, S.; Wu, X.; Li, Z.; Tao, W.; Jenkinson, I. R. Highly Sensitive and Selective Fluorescent Detection of Phosphate in Water Environment by a Functionalized Coordination Polymer. *Water Research* **2019**, *163*, 114883.
9. Yang, J.; Dai, Y.; Zhu, X.; Wang, Z.; Li, Y.; Zhuang, Q.; Shi, J.; Gu, J. Metal-Organic Frameworks with Inherent Recognition Sites for Selective Phosphate Sensing through Their Coordination-Induced Fluorescence Enhancement Effect. *J. Mater. Chem. A* **2015**, *3*, 7445–7452.
10. Chandra Rao, P.; Mandal, S. Europium-Based Metal-Organic Framework as a Dual Luminescence Sensor for the Selective Detection of the Phosphate Anion and  $\text{Fe}^{3+}$  Ion in Aqueous Media. *Inorg. Chem.* **2018**, *57*, 11855–11858.
11. Asha, K. S.; Bhattacharjee, R.; Mandal, S. Complete Transmetalation in a Metal-Organic Framework by Metal Ion Metathesis in a Single Crystal for Selective Sensing of Phosphate Ions in Aqueous Media. *Angew. Chem. Int. Ed.* **2016**, *55*, 11528–11532.
12. Song, X.; Ma, Y.; Ge, X.; Zhou, H.; Wang, G.; Zhang, H.; Tang, X.; Zhang, Y. Europium-Based Infinite Coordination Polymer Nanospheres as an Effective Fluorescence Probe for Phosphate Sensing. *RSC Adv.* **2017**, *7*, 8661–8669.
